# Supplementary material for: A high temperature reduction cleaning (HTRC) process: a novel method for conductivity recovery of yttrium-doped barium zirconate electrolytes
Source: Royal Society of Chemistry journal article supplement (doi:10.1039/c6ta03552c), 2016-01-01
Supplement: c6ta03552c1.pdf [file c6ta03552c1.pdf]

Electronic Supplementary Information

**High Temperature Reduction Cleaning (HTRC) Process: A Novel Method for Conductivity Recovery of Yttrium-doped Barium Zirconate Electrolyte**

Donglin Han <sup>a\*</sup>, Junji Iihara <sup>b</sup>, Shigeaki Uemura <sup>b</sup>, Kenji Kazumi <sup>a</sup>, Chihiro Hiraiwa <sup>b</sup>,  
Masatoshi Majima <sup>b</sup>, Tetsuya Uda <sup>a\*</sup>

<sup>a</sup> Department of Materials Science and Engineering, Kyoto University,  
Yoshida Honmachi, Sakyo-ku, Kyoto 606-8501, Japan

<sup>b</sup> Sumitomo Electric Industries, Ltd.,  
1-1-1, Koyakita, Itami-shi, Hyogo 664-0016, Japan

\* Corresponding authors: Donglin Han (han.donglin.8n@kyoto-u.ac.jp)  
and Tetsuya Uda (uda\_lab@aqua.mtl.kyoto-u.ac.jp)

TEL: +81-75-753-5445, FAX: +81-75-753-5284

In order to identify the peak that appeared at 0.78 keV, powder samples of BZY20 (without NiO additive), BaCO<sub>3</sub>, ZrO<sub>2</sub>, Y<sub>2</sub>O<sub>3</sub> and NiO were subjected to SEM-EDS analysis with Genesis-XM2 (EDAX, Mahwah, NJ) attached to a scanning electron microscope (SEM, VE-7800, Keyence Co., Osaka, Japan). The spectra are shown in **Fig. S1(a)**. For close examination the area between 0.4 and 1.1 keV is magnified in **Fig. S1(b)** for BZY20, BaCO<sub>3</sub> and NiO. It is clear that the spectrum of BaCO<sub>3</sub> also has a peak around 0.78 keV in agreement with that of BZY20. Thus the peak at 0.78 keV can be attributed to barium, and not other elements including nickel.

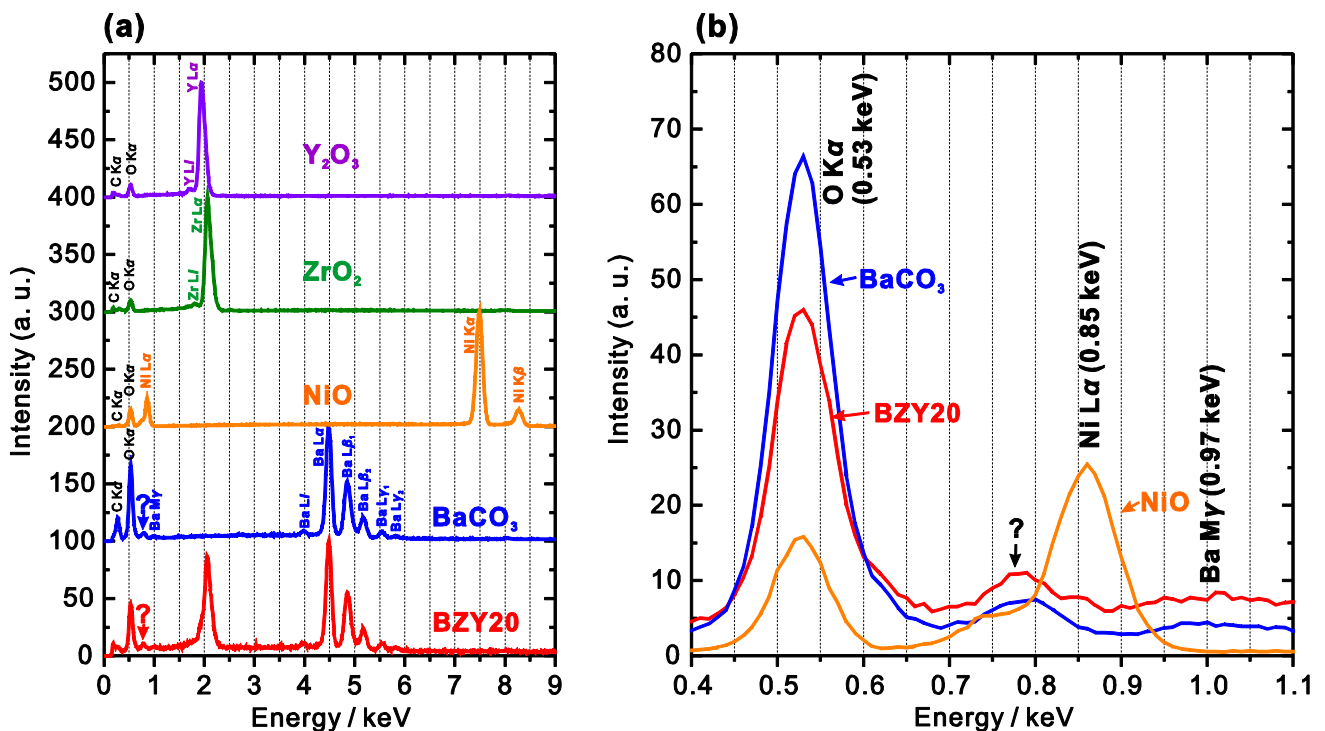

**Fig. S1** (a) SEM-EDS spectra of powder samples of BZY20 (without NiO additive) and the raw materials of BaCO<sub>3</sub>, ZrO<sub>2</sub>, Y<sub>2</sub>O<sub>3</sub> and NiO; (b) enlarged spectra of BZY20, BaCO<sub>3</sub> and NiO in the energy range between 0.4 and 1.1 keV.
